# Supplementary material for: TET1-Mediated Hydroxymethylation Facilitates Hypoxic Gene Induction in Neuroblastoma
Source: PubMed Central journal article supplement — Cell Rep. Author manuscript; Available in PMC 2015 Jul 27. (PMC4516227; doi:10.1016/j.celrep.2014.04.040), 2014-05-15
Supplement: NIHMS591957-supplement-01.pdf [file NIHMS591957-supplement-01.pdf]

## **TET1-Mediated Hydroxymethylation Facilitates**

### **Hypoxic Gene Induction In Neuroblastoma**

Christopher J. Mariani<sup>1,2</sup>, Aparna Vasanthakumar<sup>1</sup>, Jozef Madzo<sup>1</sup>, Ali Yesilkanal<sup>3</sup>, Tushar Bhagat<sup>4</sup>, Yiting Yu<sup>4</sup>, Sanchari Bhattacharyya<sup>4</sup>, Roland H. Wenger<sup>5</sup>, Susan L. Cohn<sup>6</sup>, Jayasri Nanduri<sup>7</sup>, Amit Verma<sup>4</sup>, Nanduri R. Prabhakar<sup>7</sup>, and Lucy A. Godley<sup>1,3,\*</sup>

Figure S1, Related to Figure 1

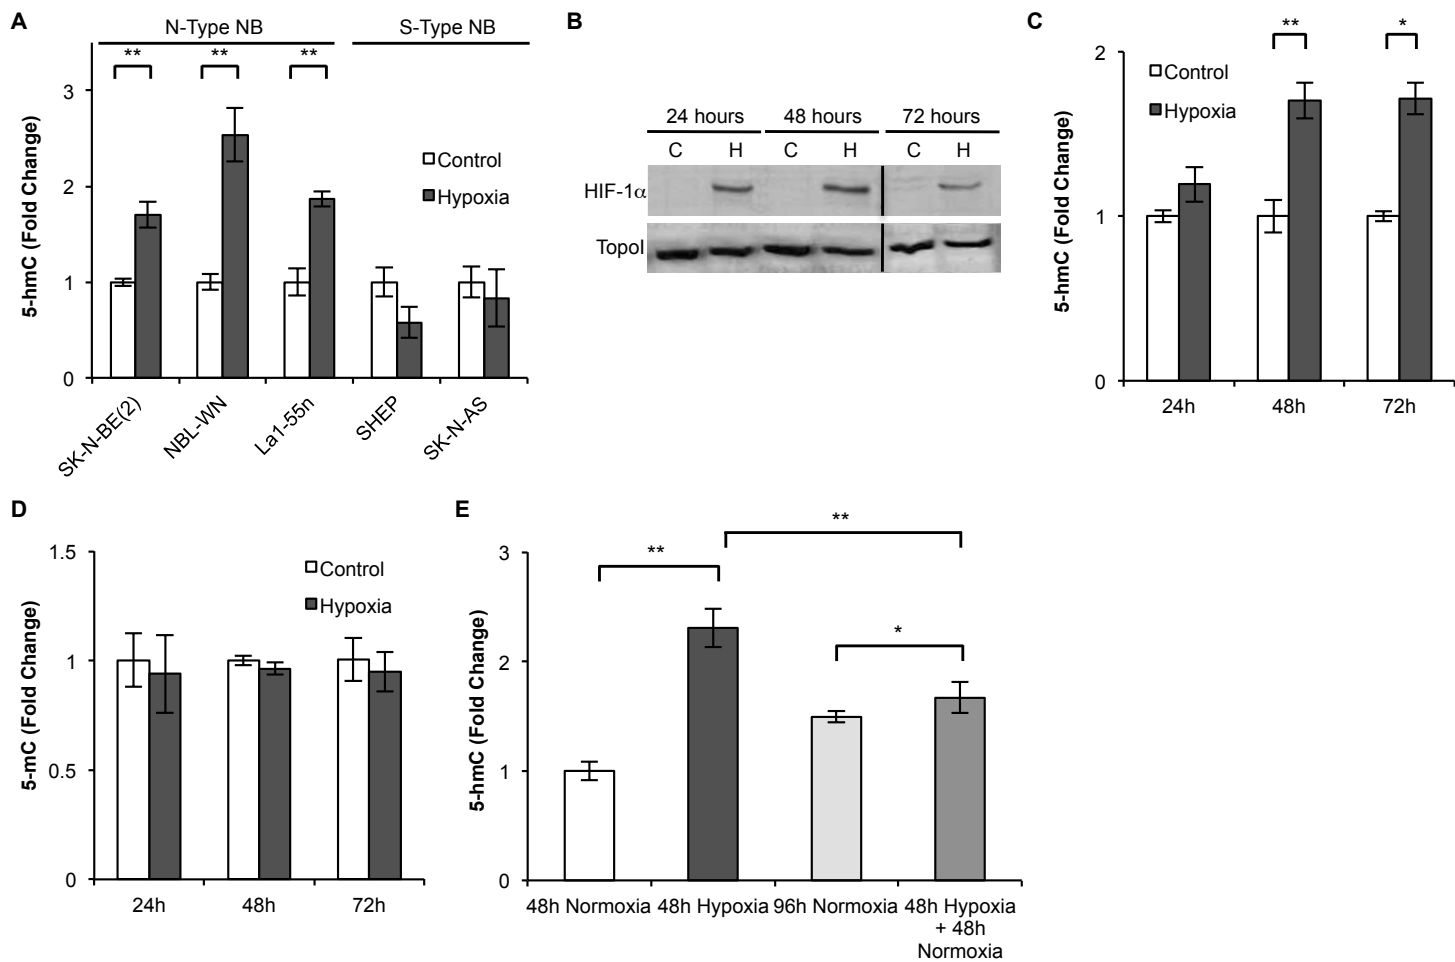

Figure S2, Related to Figure 2

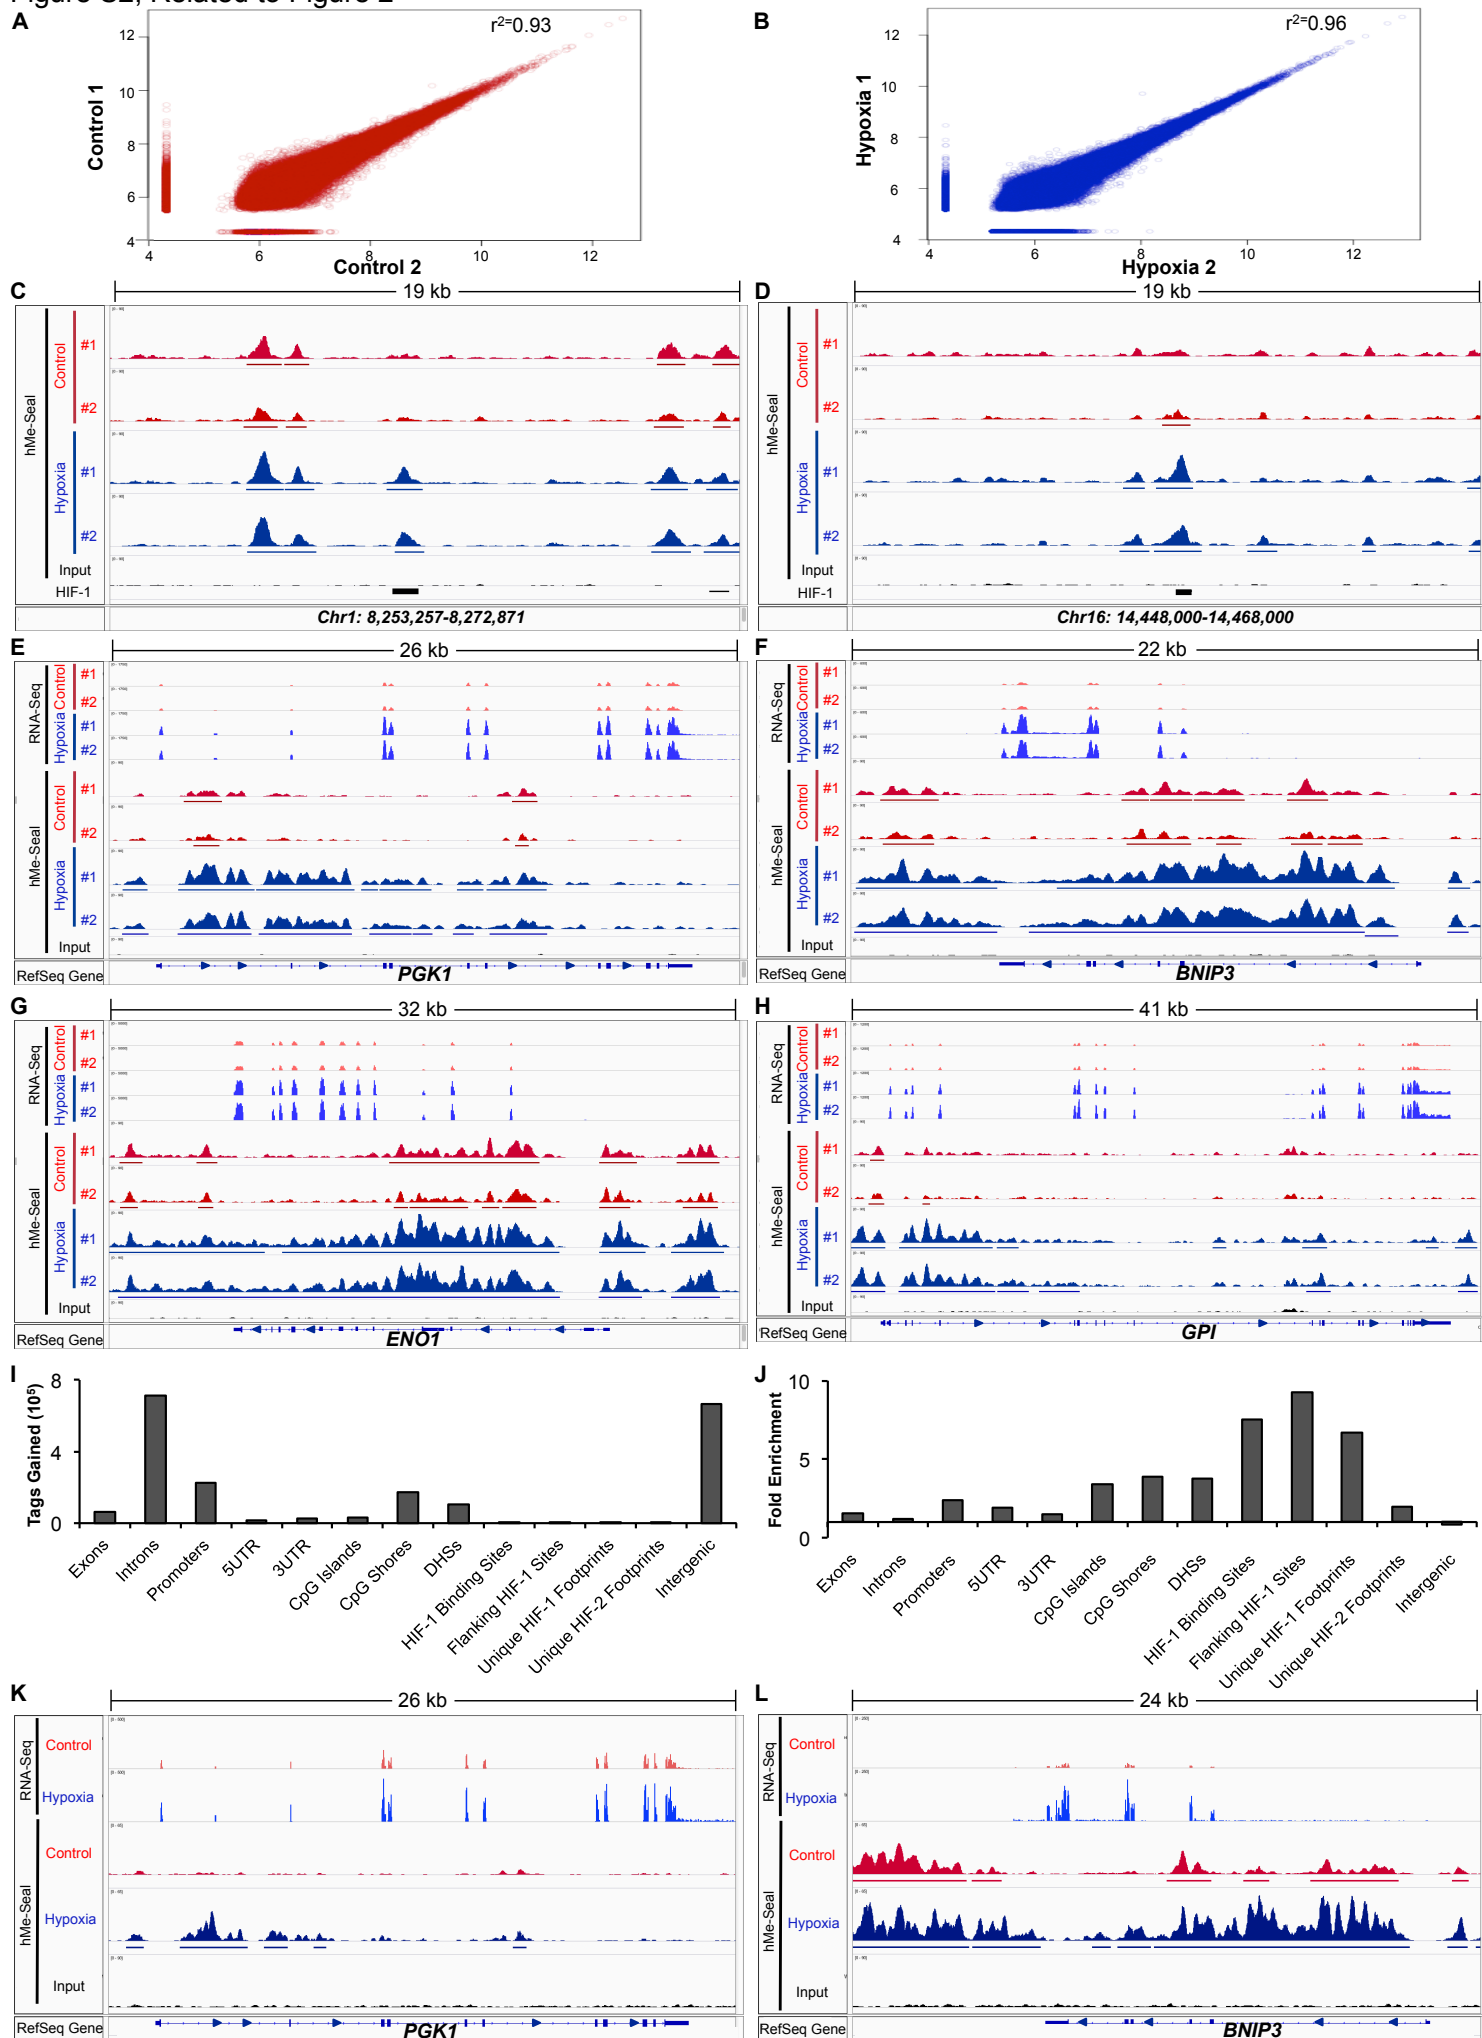

Figure S3, Related to Figure 3

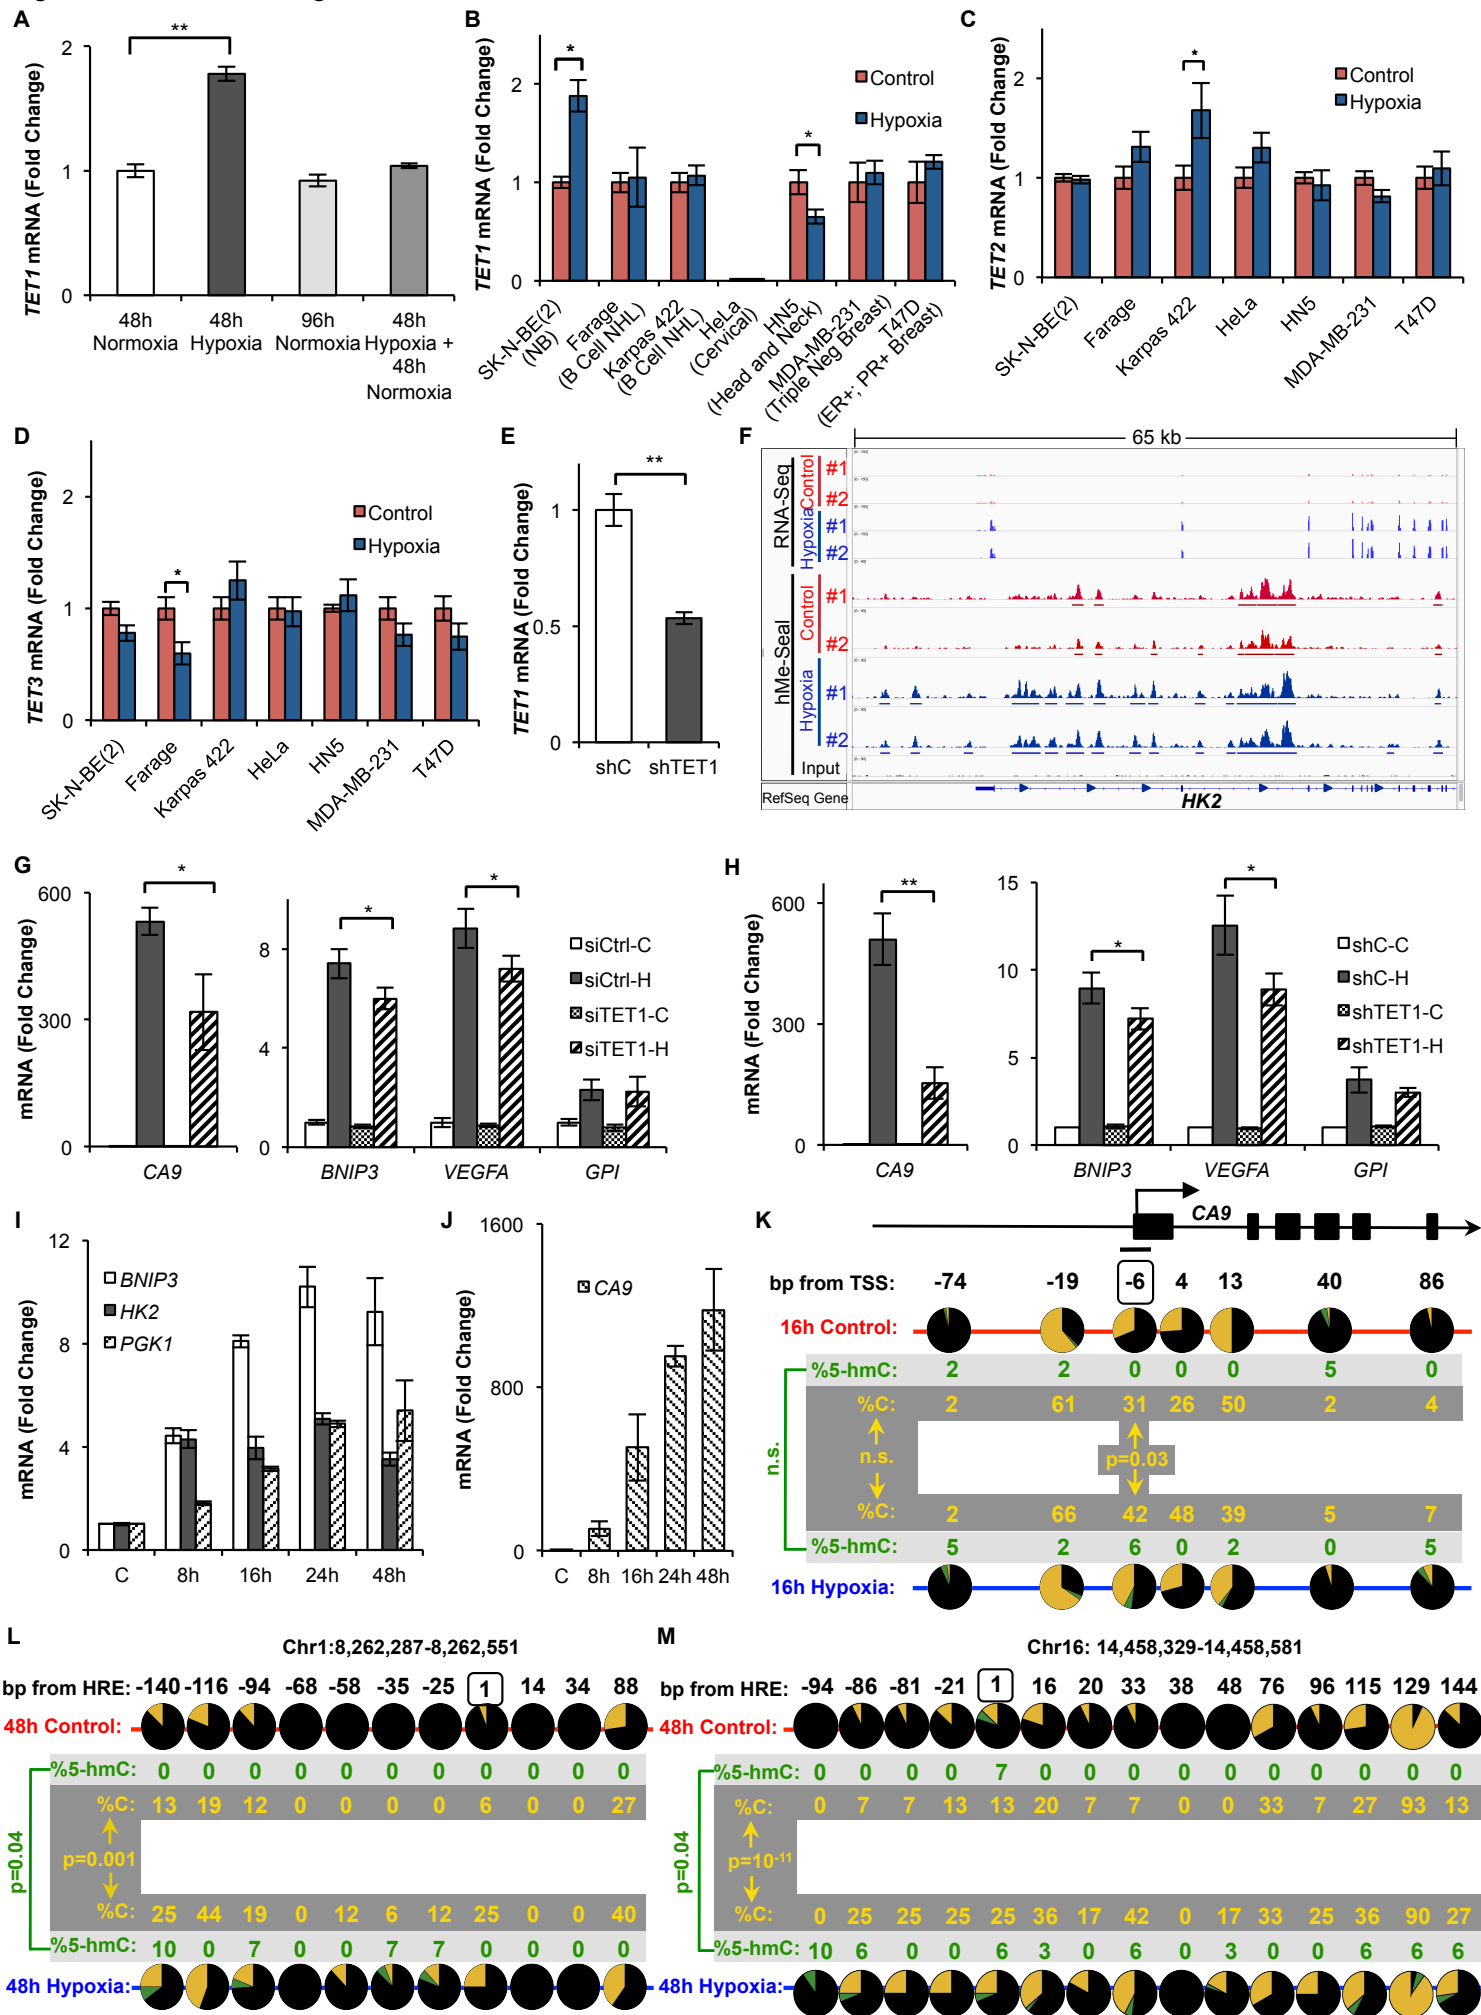

Figure S4, Related to Figure 4

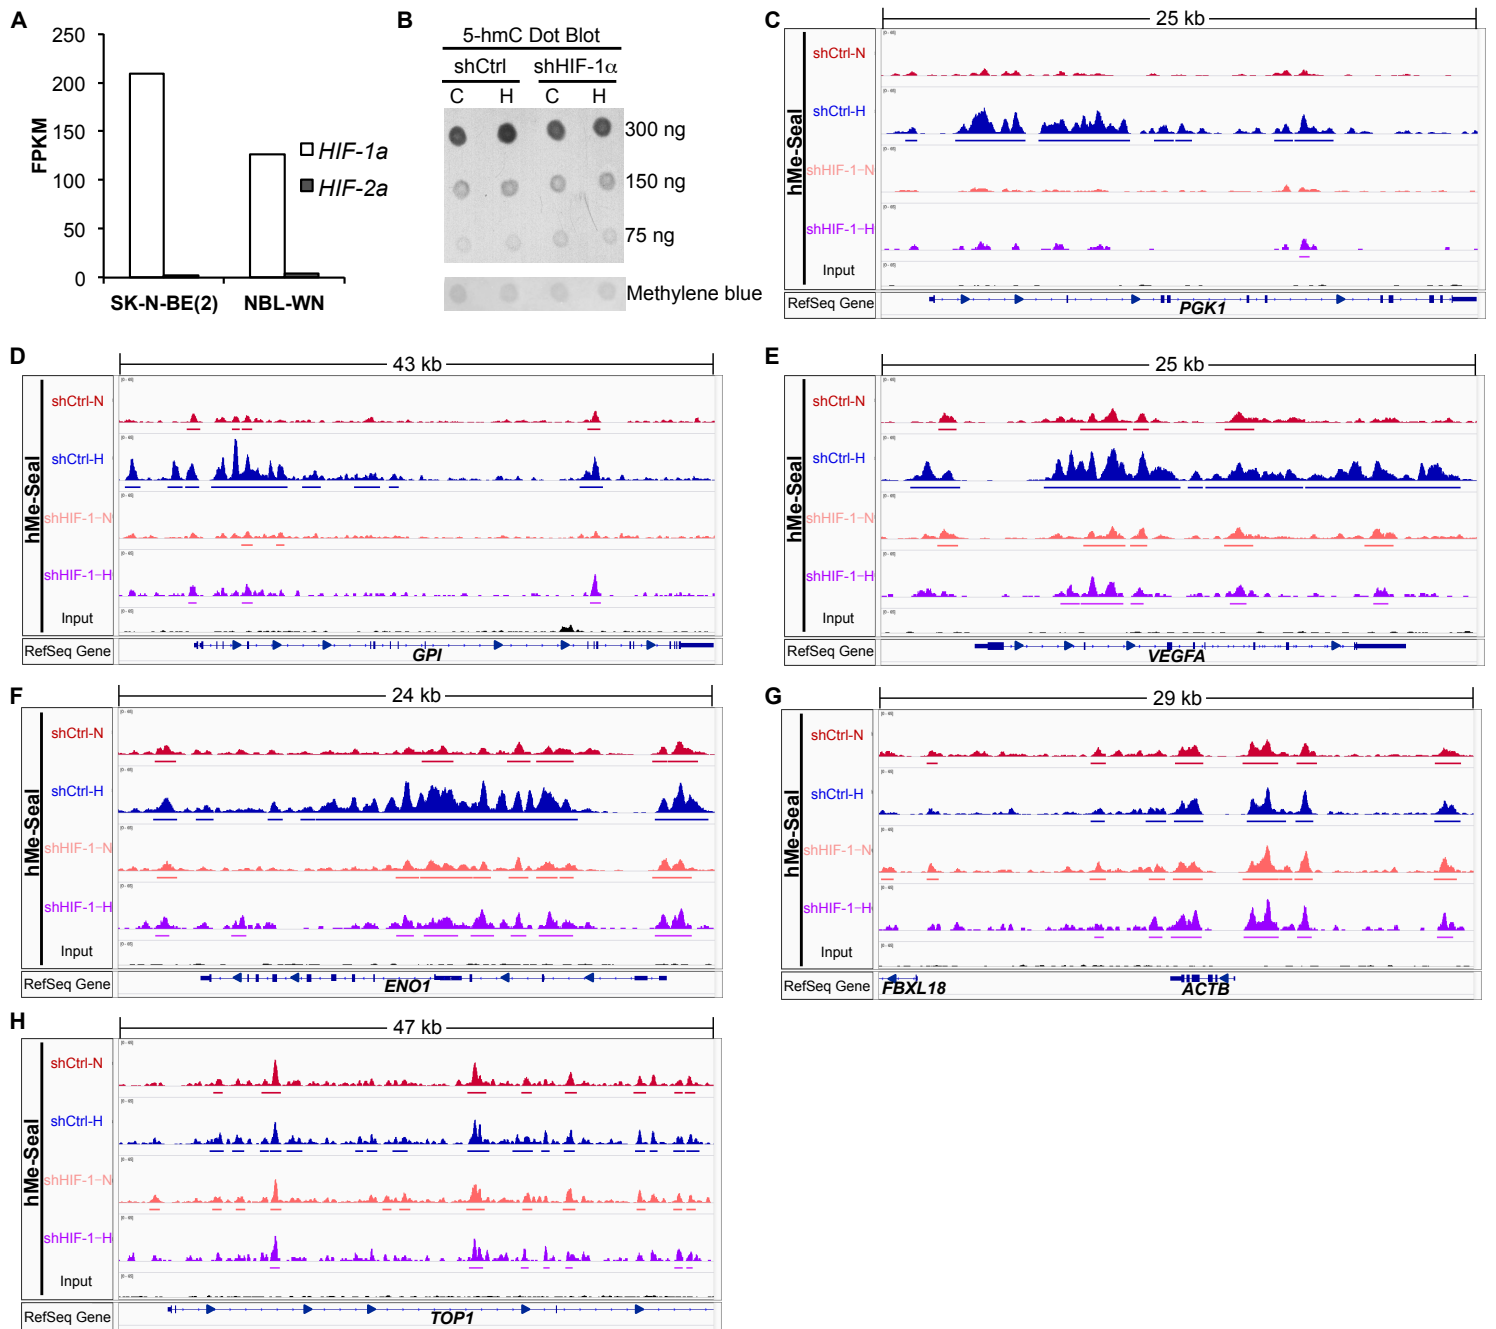

## **Supplemental Figure Legends**

### **Supplemental Figure S1. Hypoxia Induces 5-hmC Increases That Are Reversible Following Re-Oxygenation, Related to Figure 1**

(A) Quantification of 5-hmC in neuroblastoma cells exposed to 48 hours of normoxia or hypoxia. 5-hmC levels are calculated relative to normoxic controls for each cell line ( $n \geq 3$ ).

(B) HIF-1 $\alpha$  immunoblot of SK-N-BE(2) cells exposed to 24, 48, or 72 hours of hypoxia or normoxia.

(C and D) Quantitation of 5-hmC and 5-mC by HPLC-MS/MS in SK-N-BE(2) cells exposed to 24, 48, or 72 hours of hypoxia. Levels of 5-mC and 5-hmC are calculated relative to normoxic controls for each time point ( $n \geq 3$ ).

(E) Global 5-hmC levels in SK-N-BE(2) cells quantified by HPLC-MS/MS after: 48 hours of normoxia, 48 hours of hypoxia, 96 hours of normoxia, and 48 hours of hypoxia followed by 48 hours of normoxia. Bar graphs represent means  $\pm$  SEM of three experiments. P-values calculated by Student's t-test, \* $p < 0.05$ , \*\* $p < 0.01$ .

### **Supplemental Figure S2. 5-hmC Gains at Hypoxia Induced Genes and HIF-1 Binding Sites Are Highly Reproducible Between Biological Replicates and Neuroblastoma Cell Lines, Related to Figure 2**

(A and B) The number of hMe-Seal sequencing tags mapping to each genomic position from two biological replicates of experiments performed with SK-N-BE(2) cells is plotted for control (A) and hypoxia (B) samples.  $R^2$  values represent results from linear regression analysis.

(C and D) Examples of HIF-1 ChIP-Seq peaks that gain 5-hmC in hypoxia. hMe-Seal sequencing data represent two biological replicates of experiments using SK-N-BE(2) cells. The

HIF-1 track represents the positions of previously published ChIP-Seq peaks, which are displayed as black bars (Schödel et al., 2011).

(E-H) RNA-Seq and hMe-Seal sequencing data at hypoxia induced genes. Data represent two biological replicates of experiments using SK-N-BE(2) cells.

(I and J) Absolute 5-hmC gains (I) and enrichment of 5-hmC gains (J) at genomic elements in NBL-WN cells.

(K and L) RNA-Seq and hMe-Seal sequencing data at hypoxia-induced genes in NBL-WN cells.

**Supplemental Figure S3. *TET1* is Up-Regulated in Hypoxia and is Required for Full Hypoxic Gene Induction, Related to Figure 3**

(A) *TET1* mRNA quantified by qPCR after: 48 hours of normoxia, 48 hours of hypoxia, 96 hours of normoxia, or 48 hours of hypoxia followed by 48 hours of normoxia. Experiments performed using SK-N-BE(2) cells. Data represent means  $\pm$  SEM of three experiments. P-value calculated by Student's t-test, \*\* $p < 0.01$ .

(B-D) *TET* expression measured by qPCR after 48 hours of hypoxia using: Farage (B-cell non-Hodgkin lymphoma), Karpas 422 (diffuse large B-cell lymphoma with t(11;14)), HeLa (cervical cancer), HN5 (head and neck cancer), MDA-MB-231 (triple negative breast cancer), and T47D (ER+ PR+ breast cancer) cell lines. Data represent means  $\pm$  SEM of three experiments. P-values calculated by Student's t-test, \* $p < 0.05$ .

(E) *TET1* expression in shTET1 and shCtrl transduced cells measured by qPCR. Data represent means  $\pm$  SEM of three experiments. P-value calculated by Student's t-test, \*\* $p < 0.01$ .

(F) hMe-Seal and RNA-Seq data at *HK2* from SK-N-BE(2) cells exposed to 48 hours of hypoxia. Data represent two biological replicates.

(G and H) Gene expression after 16 hours of hypoxia in cells depleted of *TET1* by siRNA (G) or shRNA (H). Data represent means  $\pm$  SEM of three experiments. P-value calculated by Student's t-test, \* $p < 0.05$ , \*\* $p < 0.01$ .

(I and J) Induction kinetics of hypoxia-induced genes in SK-N-BE(2) cells exposed to 8-48 hours of hypoxia. mRNA levels quantified by qPCR. Data represent means  $\pm$  SEM from three experiments.

(K) TAB-Seq of the *CA9* TSS after 16 hours of hypoxia. The boxed CpG represents the CpG within the ACGTG consensus sequence. P-values were calculated by Chi-squared tests using data from all CpGs within the amplicon or the CpG within the HRE only. Black, green, and gold represent 5-mC, 5-hmC, and unmodified cytosine, respectively. Data represent pooled sequencing data from three independent experiments.

(L and M) TAB-Seq of HREs gaining 5-hmC by hMe-Seal experiments after 48 hours of hypoxia or normoxia. Data represent pooled sequencing data from three independent experiments. P-values calculated by Chi-squared tests.

**Supplemental Figure S4. Genome-Wide and Site-Specific 5-hmC Gains are HIF-1-Dependent, Related to Figure 4**

(A) *HIF-1 $\alpha$*  and *HIF-2 $\alpha$*  expression in SK-N-BE(2) and NBL-WN cells as measured by RNA-Seq.

(B) Dot blot quantification of global 5-hmC levels in shCtrl or shHIF-1 $\alpha$  transduced SK-N-BE(2) cells exposed to 48 hours of hypoxia.

(C-F) hMe-Seal sequencing data at hypoxia-induced genes obtained from shCtrl or shHIF-1 $\alpha$  transduced cells exposed to 48 hours of hypoxia or normoxia.



(G and H) hMe-Seal sequencing data acquired from shCtrl or shHIF-1 $\alpha$  transduced cells at regions not regulated by hypoxia.
